# Supplementary material for: Characteristics of Single Pivotal Trials Supporting Regulatory Approvals of Novel Non‐orphan, Non‐oncology Drugs in the European Union and United States from 2012−2016
Source: PubMed Central journal article supplement — Clin Transl Sci. 2019 Mar 2;12(4):361–70. doi: 10.1111/cts.12617 (PMC6662549; doi:10.1111/cts.12617), 2019-03-02
Supplement: CTS-12-361-s002.pdf [file CTS-12-361-s002.pdf]

| Novel therapeutic drug                        |                               | Year of approval     | Initially approved indication(s) - abbreviated <sup>a</sup>                                                                                                                                    |                                                                                                                                                                                             |
|-----------------------------------------------|-------------------------------|----------------------|------------------------------------------------------------------------------------------------------------------------------------------------------------------------------------------------|---------------------------------------------------------------------------------------------------------------------------------------------------------------------------------------------|
| INN                                           | Brand name                    |                      | EU                                                                                                                                                                                             | US                                                                                                                                                                                          |
| <b>Acclidinium bromide</b>                    | EU: Eklira                    | EU: 2012<br>US: 2012 | Maintenance bronchodilator treatment to relieve symptoms in adult patients with COPD                                                                                                           | <i>Maintenance treatment of bronchospasm associated with COPD</i>                                                                                                                           |
|                                               | US: Tudorza<br>Pressair       |                      |                                                                                                                                                                                                |                                                                                                                                                                                             |
| <b>Cangrelor</b>                              | EU: Kengrexal<br>US: Kengreal | EU: 2015<br>US: 2015 | Reduction of thrombotic CV events in patients with coronary artery disease undergoing percutaneous coronary intervention                                                                       | For reducing the risk of periprocedural MI, repeat coronary revascularization, and stent thrombosis                                                                                         |
| <b>Ceftolozane/<br/>tazobactam</b>            | Zerbaxa                       | EU: 2015<br>US: 2014 | <b>1)</b> cIAI<br><b>2)</b> cUTI incl. acute pyelonephritis                                                                                                                                    | <b>1)</b> cIAI used in combination with metronidazole<br><b>2)</b> cUTI incl. pyelonephritis                                                                                                |
| <b>Cobicistat</b>                             | Tybost                        | EU: 2013<br>US: 2014 | Pharmacokinetic enhancement of atazanavir or darunavir as part of antiretroviral combination therapy in HIV-1 infected adults                                                                  | <i>Increase systemic exposure of atazanavir or darunavir in combination w. other antiretroviral agents in treatment of HIV-1 infection</i>                                                  |
| <b>Conjugated estrogens/<br/>bazedoxifene</b> | EU: Duavive                   | EU: 2014             | <i>Treatment of oestrogen deficiency symptoms in postmenopausal women with a uterus</i>                                                                                                        | <b>1)</b> Treatment of moderate to severe vasomotor symptoms associated with menopause                                                                                                      |
|                                               | US: Duavee                    | US: 2013             |                                                                                                                                                                                                | <b>2)</b> Prevention of postmenopausal osteoporosis                                                                                                                                         |
| <b>Daclatasvir</b>                            | Daklinza                      | EU: 2014<br>US: 2015 | In combination with other medicines for treatment of chronic hepatitis C virus infection                                                                                                       | For use with sofosbuvir for the treatment of chronic HCV genotype 3 infection                                                                                                               |
| <b>DTG + 3TC/ ABC<sup>b</sup></b>             | Triumeq                       | EU: 2014<br>US: 2014 | Treatment of HIV infection                                                                                                                                                                     | <i>Treatment of HIV-1 infection</i>                                                                                                                                                         |
| <b>Edoxaban</b>                               | EU: Lixiana                   | EU: 2015             | <b>1)</b> Prevention of stroke and systemic embolism in patients with nonvalvular atrial fibrillation<br><b>2)</b> Treatment of DVT and PE, and prevention of recurrent DVT and PE             | <b>1)</b> Reduction of risk of stroke and systemic embolism in patients with nonvalvular atrial fibrillation                                                                                |
|                                               | US: Savaysa                   | US: 2015             |                                                                                                                                                                                                | <b>2)</b> Treatment of DVT and PE following initial therapy with a parenteral anticoagulant                                                                                                 |
| <b>Elvitegravir<sup>c</sup></b>               | Vitekta                       | EU: 2013<br>US: 2014 | Coadministered with ritonavir-boosted protease inhibitor and with other antiretroviral agents, for the treatment of HIV-1 infection in adults                                                  | <i>(...) in combination with an HIV protease inhibitor coadministered with ritonavir and other antiretroviral drug(s), for treatment of HIV-1 infection in adults</i>                       |
| <b>Ivabradine</b>                             | EU: Corlentor                 | EU: 2005             | <b>1)</b> Treatment of chronic stable angina pectoris<br><b>2)</b> Treatment of chronic HF                                                                                                     | Indicated to reduce the risk of hospitalization for worsening HF in patients with chronic HF                                                                                                |
|                                               | US: Corlanor                  | US: 2015             |                                                                                                                                                                                                |                                                                                                                                                                                             |
| <b>Lomitapide</b>                             | EU: Lojuxta<br>US: Juxtapid   | EU: 2013<br>US: 2012 | Adjunct to a low-fat diet and other lipid-lowering medicinal products in adult patients with HoFH                                                                                              | <i>Adjunct to a low-fat diet and other lipid-lowering treatments in patients with HoFH</i>                                                                                                  |
| <b>Netupitant /<br/>palonosetron</b>          | Akynzeo                       | EU: 2015<br>US: 2014 | <b>1)</b> Nausea and vomiting associated with highly emetogenic cisplatin-based cancer chemotherapy<br><b>2)</b> Nausea and vomiting associated with moderately emetogenic cancer chemotherapy | <i>Prevention of acute and delayed nausea and vomiting associated with initial and repeat courses of cancer chemotherapy, including, but not limited to, highly emetogenic chemotherapy</i> |

| Novel therapeutic drug          |              | Year of approval     | Initially approved indication(s) - abbreviated <sup>a</sup>                                                   |                                                                                                                                          |
|---------------------------------|--------------|----------------------|---------------------------------------------------------------------------------------------------------------|------------------------------------------------------------------------------------------------------------------------------------------|
| INN                             | Brand name   |                      | EU                                                                                                            | US                                                                                                                                       |
| <b>Patiromer</b>                | Veltassa     | EU: 2017<br>US: 2015 | <i>Treatment of hyperkalaemia</i>                                                                             | Treatment of hyperkalemia                                                                                                                |
| <b>Peginterferon beta-1a</b>    | Plegridy     | EU: 2014<br>US: 2014 | Treatment of relapsing remitting MS                                                                           | Treatment of patients with relapsing forms of MS                                                                                         |
| <b>Peramivir</b>                | US: Rapivab  | EU: N/A<br>US: 2014  | <i>Not authorized</i>                                                                                         | Treatment of acute uncomplicated influenza                                                                                               |
| <b>Pimavanserin</b>             | US: Nuplazid | EU: N/A<br>US: 2016  | <i>Not authorized</i>                                                                                         | Treatment of hallucinations and delusions associated with Parkinson's disease psychosis                                                  |
| <b>Sacubitril/valsartan</b>     | Entresto     | EU: 2015<br>US: 2015 | Treatment of symptomatic chronic heart failure with reduced ejection fraction                                 | Reduction of risk of CV death and hospitalization for heart failure in patients with chronic heart failure and reduced ejection fraction |
| <b>Selexipag</b>                | Uptravi      | EU: 2016<br>US: 2015 | Long-term treatment of PAH in adult patients with WHO functional class II–III, as combination, or monotherapy | <i>Treatment of PAH (WHO Group I) to delay disease progression and reduce risk of hospitalization for PAH</i>                            |
| <b>Sucroferric oxyhydroxide</b> | Velphoro     | EU: 2014<br>US: 2013 | Control of serum phosphorus levels in adult chronic kidney disease patients on dialysis                       | <i>Indicated for the control of serum phosphorus levels in patients with chronic kidney disease on dialysis</i>                          |
| <b>Susoctocog alfa</b>          | Obizur       | EU: 2015<br>US: 2014 | Treatment of bleeding episodes in patients with acquired haemophilia                                          | <i>Indicated for the treatment of bleeding episodes in adults with acquired hemophilia A</i>                                             |
| <b>Teriflunomide</b>            | Aubagio      | EU: 2013<br>US: 2012 | <i>Treatment of relapsing remitting MS</i>                                                                    | Treatment of relapsing forms of MS                                                                                                       |
| <b>Vedolizumab</b>              | Entyvio      | EU: 2014<br>US: 2014 | <b>1)</b> Moderate to severe ulcerative colitis<br><b>2)</b> <i>Mod. to severely active Crohn's disease</i>   | <b>1)</b> Moderately to severely active ulcerative colitis<br><b>2)</b> <i>Mod. to severely active Crohn's disease</i>                   |
| <b>Vorapaxar<sup>d</sup></b>    | Zontivity    | EU: 2015<br>US: 2014 | Reduction of atherothrombotic events in patients w. history of MI                                             | Reduction of thrombotic CV events in patients w. history of MI or peripheral arterial disease                                            |

<sup>a</sup> Abbreviations: AIDS – Acquired immune deficiency syndrome; cIAI - Complicated intra-abdominal infections; COPD - chronic obstructive pulmonary disease; CV – Cardiovascular; cUTI - Complicated urinary tract infections; DVT - Deep vein thrombosis; HIV - Human immunodeficiency virus; HF – Heart failure; HoFH - Homozygous familial hypercholesterolaemia; MI - Myocardial infarction; MS - Multiple sclerosis; PAH - Pulmonary arterial hypertension; PE - Pulmonary embolism. <sup>b</sup> abacavir / dolutegravir / lamivudine. <sup>c</sup> EU: Withdrawn. US: Discontinued. <sup>d</sup> EU: Withdrawn

Table S1 – Indications approved for novel therapeutic drugs based on a single pivotal trial

Novel therapeutic drugs (excluding oncology and orphan drugs) for which one or more indications were approved based on a single pivotal trial by FDA

CDER and/or the EMA between 2012 and 2016. For combination products, the New Active Substance or New Molecular Entity component is underscored.

**GREY** shading and *italics* signify that the product or indication is either not authorized or does not fulfill the study selection criteria in the region in question.

**BLUE** and **RED** shadings indicate EU and US indications, respectively, that fulfilled the inclusion criteria.
